# Supplementary material for: Revision of the oxygen reduction reaction on N-doped graphenes by grand-canonical DFT
Source: Royal Society of Chemistry journal article supplement (doi:10.1039/d3cp04517j), 2023-11-23
Supplement: d3cp04517j1.pdf [file d3cp04517j1.pdf]

## Supporting Information

for

### Revision of the oxygen reduction reaction on N-doped graphenes by grand-canonical DFT

Kislenko V.A.<sup>1,2</sup>, Pavlov S.V.<sup>2</sup>, Nikitina V.A.<sup>1</sup>, Kislenko S.A.<sup>2,\*</sup>

<sup>1</sup>Skolkovo Institute of Science and Technology (Skoltech), Bolshoy Boulevard 30, bld. 1,  
Moscow, 121205, Russian Federation

<sup>2</sup>Joint Institute for High Temperatures of the Russian Academy of Sciences,  
Izhorskaya 13/2, Moscow, 125412, Russian Federation

\*kislenko@ihed.ras.ru

#### Section S1. Gibbs free energy calculation.

To calculate the Gibbs free energy, we used the following form of the equation where zero-point energy (ZPE) contribution is decoupled from the vibrational one:

$$G = E_e + ZPE + k_B T \left( -\ln(Z) + V \left( \frac{\partial \ln(Z)}{\partial V} \right)_T \right)$$

where  $E_e$  is the electronic energy obtained from DFT calculations,  $ZPE$  is the zero-point energy, and the last term is the contributions of the vibrational and translational/rotational (in the case of molecules in gas/liquid phase) motion of atoms to the Gibbs free energy derived from the partition function  $Z^1$ .

The total partition function of an individual molecule or graphene surface with chemisorbed intermediate  $Z$  can be written as

$$Z = \begin{cases} Z_{vib} & \text{for graphene + adsorbed/chemisorbed molecule} \\ Z_{vib} \cdot Z_{trans} \cdot Z_{rot} & \text{for an individual molecule in a gas/liquid phase} \end{cases}$$

where  $Z_{vib}$ ,  $Z_{trans}$ ,  $Z_{rot}$  are the vibrational, translational, and rotational partition functions, respectively.

Vibrational partition function for graphene with adsorbed/chemisorbed molecule and for an individual molecule (excluding zero-point vibrations):

$$Z_{vib} = \prod_{i=1}^{N_{modes}} \frac{1}{1 - \exp\left(-\frac{\hbar\omega_i}{k_B T}\right)}$$

The eigenfrequencies were calculated using the finite difference method. The amplitude of perturbations for calculating the force matrix was equal to 0.02 Bohr. The vibrational spectrum was calculated at the  $\Gamma$  point only.

According to the ideal gas and rigid-body approximations<sup>2</sup> translational and rotational partition function for an individual molecule:

$$Z_{trans} = V \left( \frac{mk_B T}{2\pi\hbar^2} \right)^{3/2} = \frac{k_B T}{P} \left( \frac{mk_B T}{2\pi\hbar^2} \right)^{3/2}$$

$$Z_{rot} = \begin{cases} \frac{2Ik_B T}{\sigma \hbar^2} & , \text{if linear molecule} \\ \frac{(2k_B T)^{3/2} (\pi I_1 I_2 I_3)^{1/2}}{\sigma \hbar^3} & , \text{if non-linear molecule} \end{cases}$$

where  $I_1, I_2, I_3, I$  are the (principal) moments of inertia,  $\sigma$  is a symmetry number ( $\sigma = 1$  for OOH;  $\sigma = 2$  for H<sub>2</sub>, O<sub>2</sub>, H<sub>2</sub>O, and H<sub>2</sub>O<sub>2</sub>).

To access the free volume  $V$  for the solvated molecules we apply the technique, suggested by De-Cai Fang<sup>3</sup>:

$$V = (\sqrt[3]{V_{cav}} - \sqrt[3]{V_{mol}})^3$$

where the cavity volume  $V_{cav}$  and molecule volume  $V_{mol}$  can be estimated from the overlapping spheres<sup>4</sup> with IDSCFR<sup>5</sup> and Bader's<sup>6</sup> radii, respectively. For the reference H<sub>2</sub> molecule the  $P = 1$  atm were taken to calculate the translational entropy and enthalpic correction.

### Section S2. Additional Figures.

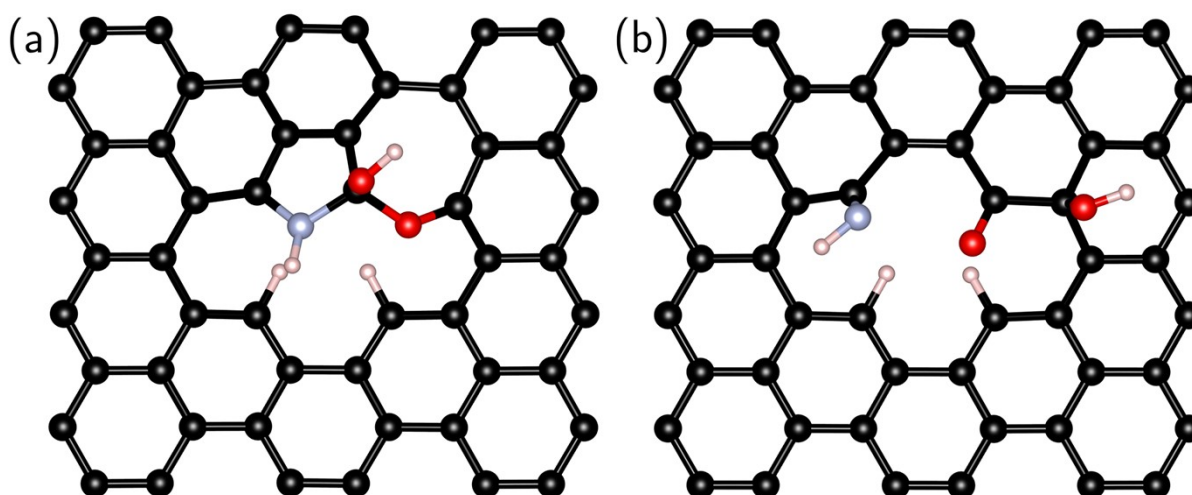

Fig. S1. The configurations of pyrrole defect reconstruction after <sup>\*</sup>OOH dissociation.

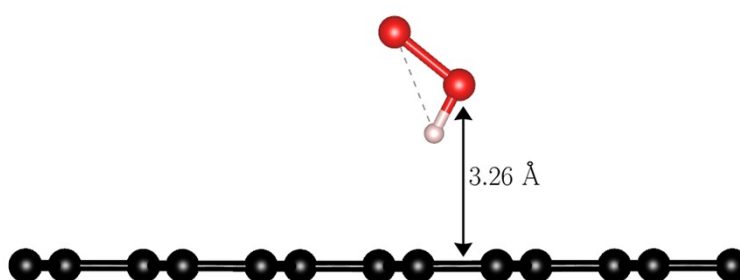

Fig. S2. The configuration of a physically adsorbed ion  $OOH_{phys}^-$  on the pristine graphene.

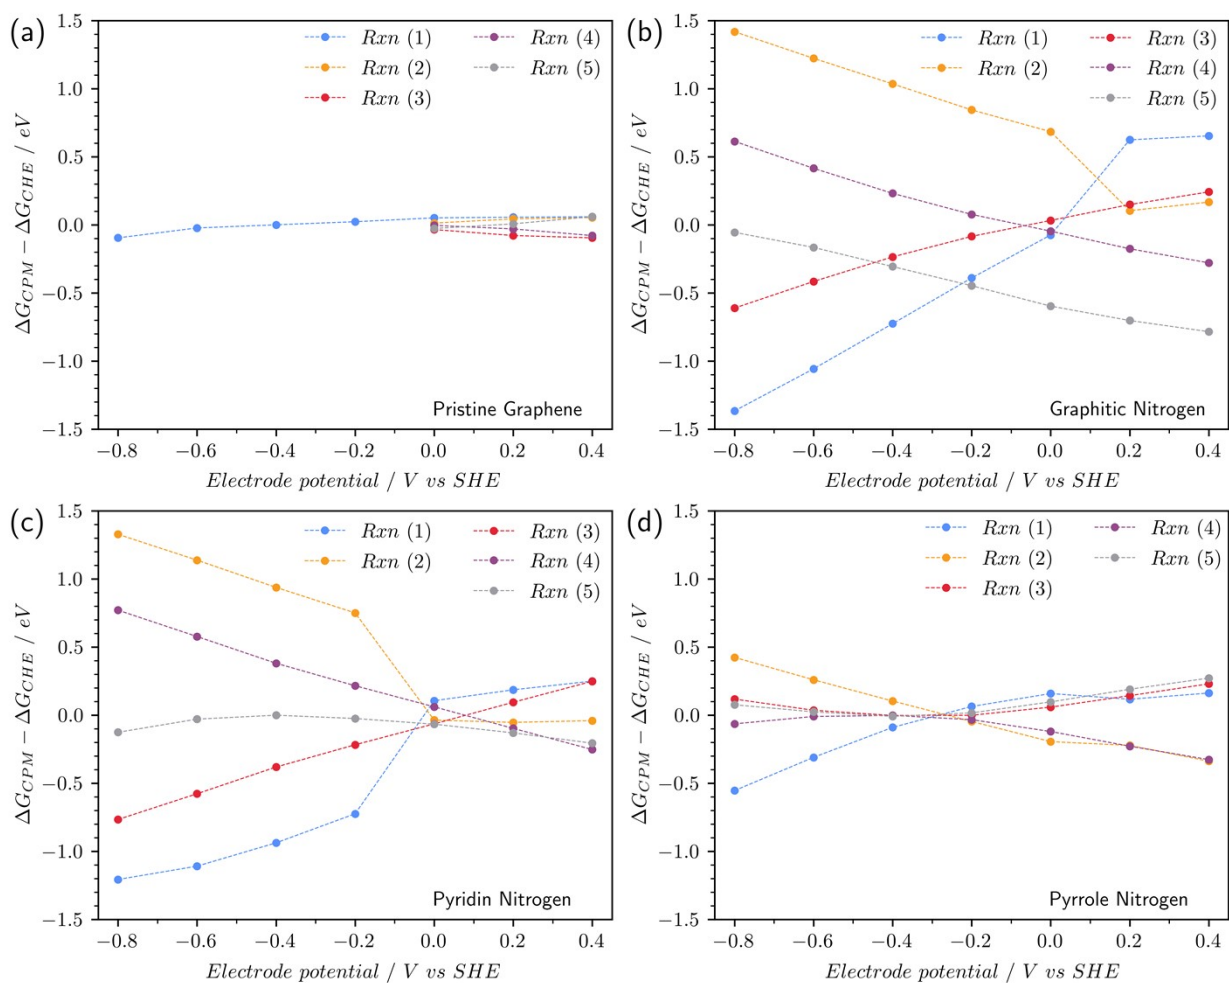

**Fig. S3.** The difference in reaction free energy calculated according to constant potential  $\Delta G_{CPM}$  and computational hydrogen electrode (CHE)  $\Delta G_{CHE}$  methods for 4e-mechanism.

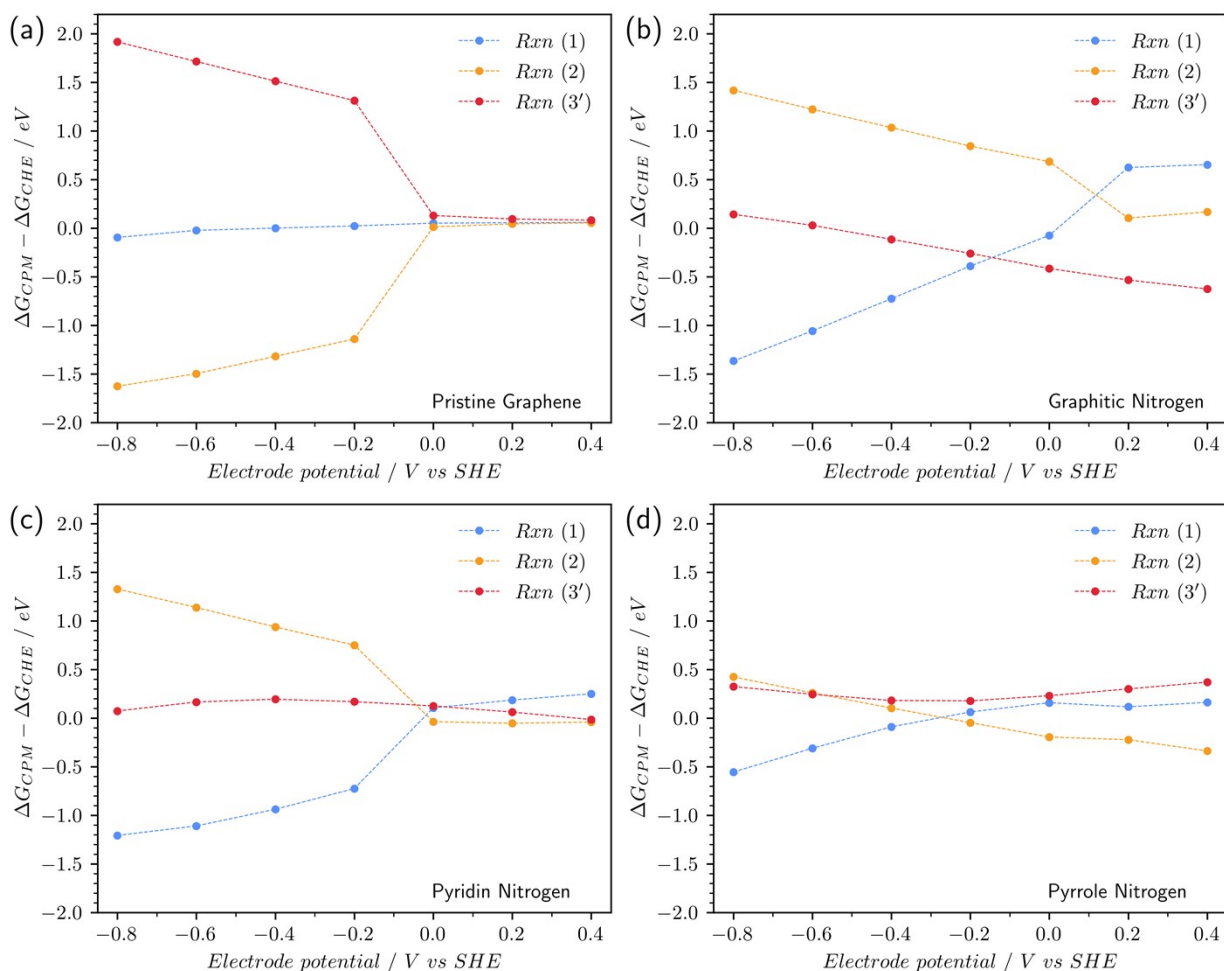

**Fig. S4.** The difference in reaction free energy calculated according to constant potential  $\Delta G_{CPM}$  and computational hydrogen electrode (CHE)  $\Delta G_{CHE}$  methods for 2e-mechanism.

#### References:

- (1) Blundell, S. J.; Blundell, K. M. *Concepts in Thermal Physics*, Chapter 20; OUP Oxford, 2010.
- (2) Landau, L. D.; Lifshitz, E. M. *Statistical Physics: Volume 5*; Elsevier, 2013.
- (3) Liu, S.-C.; Zhu, X.-R.; Liu, D.-Y.; Fang, D.-C. DFT Calculations in Solution Systems: Solvation Energy, Dispersion Energy and Entropy. *Phys. Chem. Chem. Phys.* **2023**, *25* (2), 913–931. <https://doi.org/10.1039/D2CP04720A>.
- (4) Buša, J.; Džurina, J.; Hayryan, E.; Hayryan, S.; Hu, C.-K.; Plavka, J.; Pokorný, I.; Skřivánek, J.; Wu, M.-C. ARVO: A Fortran Package for Computing the Solvent Accessible Surface Area and the Excluded Volume of Overlapping Spheres via Analytic Equations. *Comput Phys Commun* **2005**, *165* (1), 59–96. <https://doi.org/10.1016/j.cpc.2004.08.002>.
- (5) Tao, J.-Y.; Mu, W.-H.; Chass, G. A.; Tang, T.-H.; Fang, D.-C. Balancing the Atomic Waistline: Isodensity-Based Scrf Radii for Main-Group Elements and Transition Metals. *Int J Quantum Chem* **2013**, *113* (7), 975–984. <https://doi.org/10.1002/qua.24065>.
- (6) Bader, R. F. W. *Atoms in Molecules: A Quantum Theory*; International Ser. of Monogr. on Chem; Clarendon Press, 1994.
